# Supplementary material for: Traversing the Evolution of Research on Engineering Education for Sustainability: A Bibliometric Review (1991–2022)
Source: MDPI journal article supplement (doi:10.3390/su16020641), 2024-01-11
Supplement: s1 [file s1]

Archive with 1 entries (1 files):
- sustainability-2746464-supplementary.pdf
